# Supplementary material
Source: PubMed Central journal article supplement (PMC3349296)
Supplement: supp_jis201_jis201_supplementary_data.pdf [file supp_jis201_jis201_supplementary_data.pdf]

51. Alonso-Villaverde C, Coll B, Parra S, et al. Atherosclerosis in patients infected with HIV is influenced by a mutant monocyte chemoattractant protein-1 allele. *Circulation* **2004**; 110:2204–9.
52. Szalai C, Duba J, Prohaszka Z, et al. Involvement of polymorphisms in the chemokine system in the susceptibility for coronary artery disease (CAD). Coincidence of elevated Lp(a) and MCP-1 -2518 G/G genotype in CAD patients. *Atherosclerosis* **2001**; 158:233–9. 590
53. Mujawar Z, Rose H, Morrow MP, et al. Human immunodeficiency virus impairs reverse cholesterol transport from macrophages. *PLoS Biol* **2006**; 4:e365. 595
54. Triant VA, Meigs JB, Grinspoon SK. Association of C-reactive protein and HIV infection with acute myocardial infarction. *J Acquir Immune Defic Syndr* **2009**; 51:268–73.
55. Triant VA, Lee H, Hadigan C, Grinspoon SK. Increased acute myocardial infarction rates and cardiovascular risk factors among patients with human immunodeficiency virus disease. *J Clin Endocrinol Metab* **2007**; 92:2506–12. 600
56. Lichtenstein KA, Armon C, Buchacz K, et al. Low CD4+ T cell count is a risk factor for cardiovascular disease events in the HIV outpatient study. *Clin Infect Dis* **2010**; 51:435–47. 605
57. Kaplan RC, Sinclair E, Landay AL, et al. T cell activation and senescence predict subclinical carotid artery disease in HIV-infected women. *J Infect Dis* **2011**; 203:452–63.
58. Hansson GK. Inflammation, atherosclerosis, and coronary artery disease. *N Engl J Med* **2005**; 352:1685–95. 610
59. Libby P. Inflammation in atherosclerosis. *Nature* **2002**; 420:868–74.
60. Tilton JC, Johnson AJ, Luskin MR, et al. Diminished production of monocyte proinflammatory cytokines during human immunodeficiency virus viremia is mediated by type I interferons. *J Virol* **2006**; 80: 11486–97. 615
61. Melnick JL, Adam E, DeBaakey ME. Possible role of cytomegalovirus in atherogenesis. *JAMA* **1990**; 263:2204–7.
62. Hsue PY, Hunt PW, Sinclair E, et al. Increased carotid intima-media thickness in HIV patients is associated with increased cytomegalovirus-specific T-cell responses. *AIDS* **2006**; 20:2275–83. 620

63. Motoyama S, Kondo T, Sarai M, et al. Multislice computed tomographic characteristics of coronary lesions in acute coronary syndromes. *J Am Coll Cardiol* **2007**; 50:319–26.
64. van der Wal A, Becker A, van der Loos C, Das P. Site of intimal rupture or erosion of thrombosed coronary atherosclerotic plaques is characterized by an inflammatory process irrespective of the dominant plaque morphology. *Circulation* **1994**; 89:36–44.
65. Fabrik BO, Dijkstra CD, van den Berg TK. The macrophage scavenger receptor CD163. *Immunobiology* **2005**; 210:153–60.
66. Burdo TH, Lentz MR, Autissier P, et al. Soluble CD163 made by monocyte/macrophages is a novel marker of HIV activity in early and chronic infection prior to and after anti-retroviral therapy. *J Infect Dis* **2011**; 204:154–63.
67. Aristoteli LP, Moller HJ, Bailey B, Moestrup SK, Kritharides L. The monocytic lineage specific soluble CD163 is a plasma marker of coronary atherosclerosis. *Atherosclerosis* **2006**; 184:342–7.
68. Satchell CS, Cotter AG, O'Connor EF, et al. Platelet function and HIV: a case-control study. *AIDS* **2010**; 24:649–57.
